# Supplementary material for: Thickness-dependent anisotropic transport of phonons and charges in few-layered PdSe2
Source: Royal Society of Chemistry journal article supplement (doi:10.1039/d1cp00992c), 2021-01-01
Supplement: d1cp00992c1.pdf [file d1cp00992c1.pdf]

## Supplementary Information

Kai-Cheng Zhang<sup>1\*</sup> and Lin-Yuan Cheng<sup>1</sup>

<sup>1</sup>*School of Physical Science and Technology, Bohai University, Jinzhou 121013, China*

Chen Shen<sup>2</sup>

<sup>2</sup>*Institute of Materials Science, Technical University of Darmstadt,  
Alarich-Weiss-Str. 2, 64287 Darmstadt, Germany*

Yong-Feng Li<sup>3,4</sup>

<sup>3</sup>*School of Science, Inner Mongolia University of Science and Technology, Baotou 014010, China*

<sup>4</sup>*Key laboratory of Integrated Exploitation of Bayan Obo Multi-Metal Resources,  
Inner Mongolia University of Science and Technology, Baotou 014010, China*

Yong Liu<sup>5</sup>

<sup>5</sup>*State Key Laboratory of Metastable Materials Science & Technology and College of Science,  
Yanshan University, Qinhuangdao, Hebei 066004, China*

Yan Zhu<sup>6</sup>

<sup>6</sup> *Department of Physics, Nanjing University of Aeronautics and Astronautics, Nanjing 210016, China*

(Dated: May 14, 2021)

---

\*kczhang@yeah.net

TABLE S1. The optimized lattice constants and bond lengths for layered and bulk PdSe<sub>2</sub>.

|      | $a$   | $b$   | $d_{\text{Pd-Se}}$ | $d_{\text{Se-Se}}$ |
|------|-------|-------|--------------------|--------------------|
| 1L   | 5.740 | 5.913 | 2.450              | 2.417              |
| 2L   | 5.767 | 5.925 | 2.455              | 2.419              |
| 3L   | 5.770 | 5.927 | 2.460              | 2.419              |
| 4L   | 5.773 | 5.929 | 2.466              | 2.418              |
| 5L   | 5.774 | 5.929 | 2.467              | 2.419              |
| 6L   | 5.776 | 5.931 | 2.472              | 2.424              |
| Bulk | 5.783 | 5.934 | 2.491              | 2.439              |

TABLE S2. The frequencies (THz) of infrared Raman modes  $B_{2u}^2$ ,  $B_{1u}^1$ , and  $A_u^3$  for layered and bulk PdSe<sub>2</sub>.

|      | $B_{2u}^2$ | $B_{1u}^1$ | $A_u^3$ |
|------|------------|------------|---------|
| 2L   | 0.466      | 0.293      | 0.370   |
| 3L   | 0.463      | 0.342      | 0.419   |
| 4L   | 0.514      | 0.345      | 0.438   |
| Bulk | 1.041      | 0.671      | 0.939   |

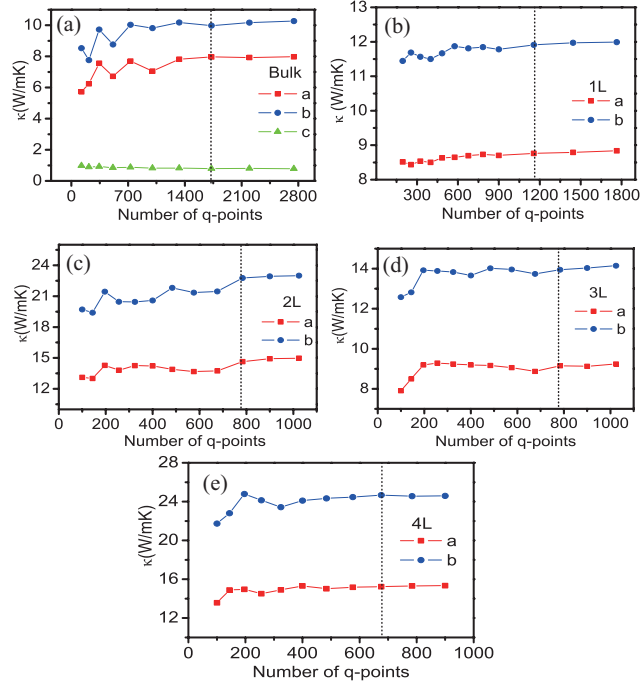FIG. S1. Convergence tests of q points used in the ShengBTE calculations for the bulk (a) 1L (b), 2L (c), 3L (d) and 4L (e) PdSe<sub>2</sub>. The dotted lines mark the convergence of thermal conductivity.

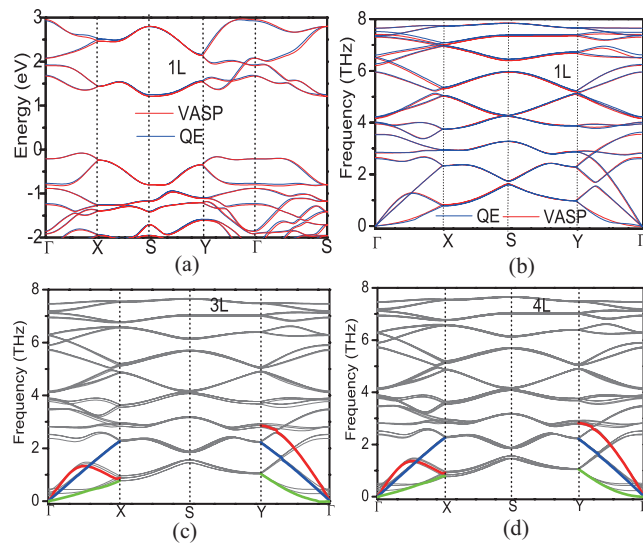

FIG. S2. The electronic (a) and phonon (b) band structures of 1L PdSe<sub>2</sub> calculated by VASP (red line) and QE (blue line) codes. Phonon dispersion for 3L (c) and 4L (d) PdSe<sub>2</sub>. The red, blue and green curves represent LA, TA and ZA modes.

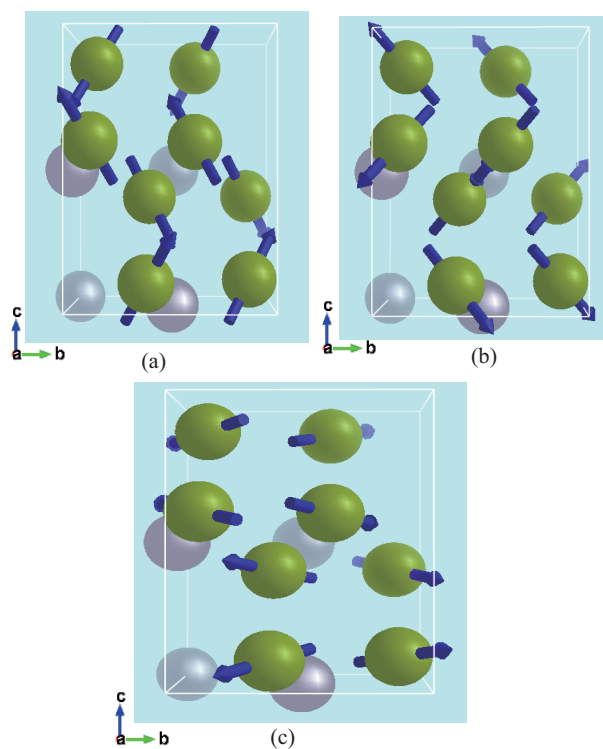

FIG. S3. Atom vibrations of Raman active modes  $A_g^1(a)$ ,  $A_g^3(b)$  and  $B_{1g}^2(c)$  for bulk PdSe<sub>2</sub>.

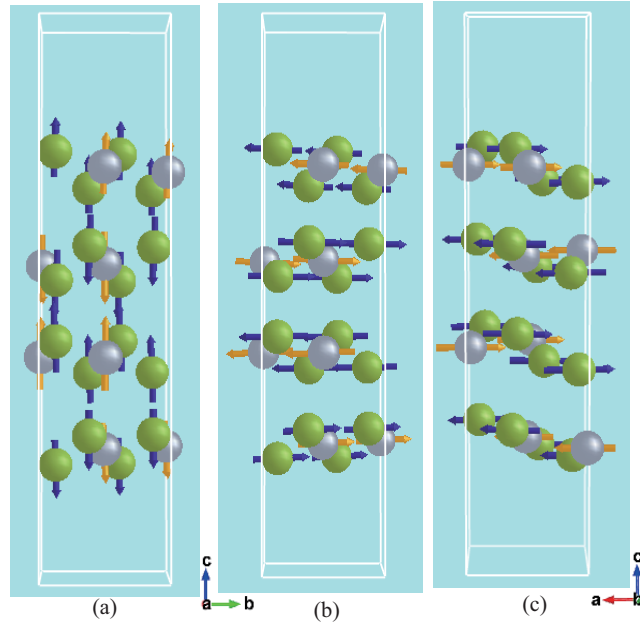

FIG. S4. Atom vibrations of low-frequency optical modes  $B_{2u}^2$  (a),  $B_{1u}^1$  (b) and  $A_u^3$  (c) for 4L PdSe<sub>2</sub>. Among them,  $B_{2u}^2$  and  $B_{1u}^1$  are infrared Raman active.

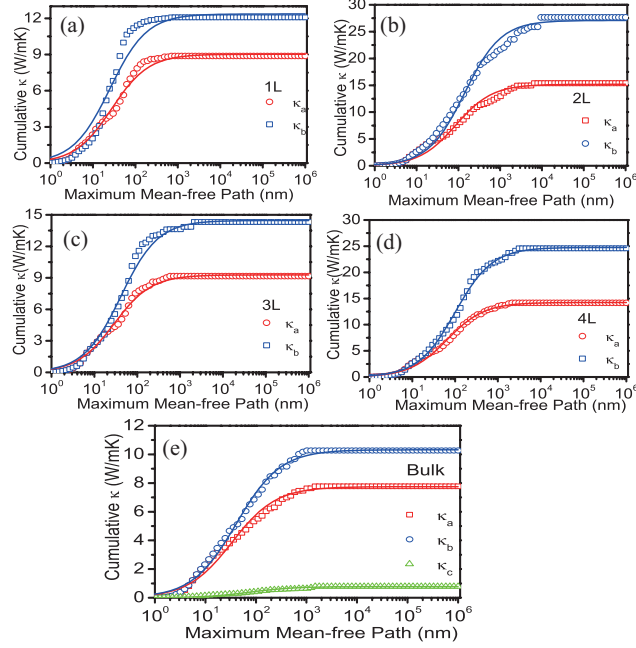

FIG. S5. The cumulative thermal conductivities versus maximum mean-free path for 1L (a), 2L (b), 3L (c), 4L (d) and bulk (e) PdSe<sub>2</sub>. The lines are the fittings with the function  $\kappa = \kappa_0 / (1 + \ell_0 / \ell)$ , where  $\ell_0$  is the representative mean-free path (rMFP) of phonon.

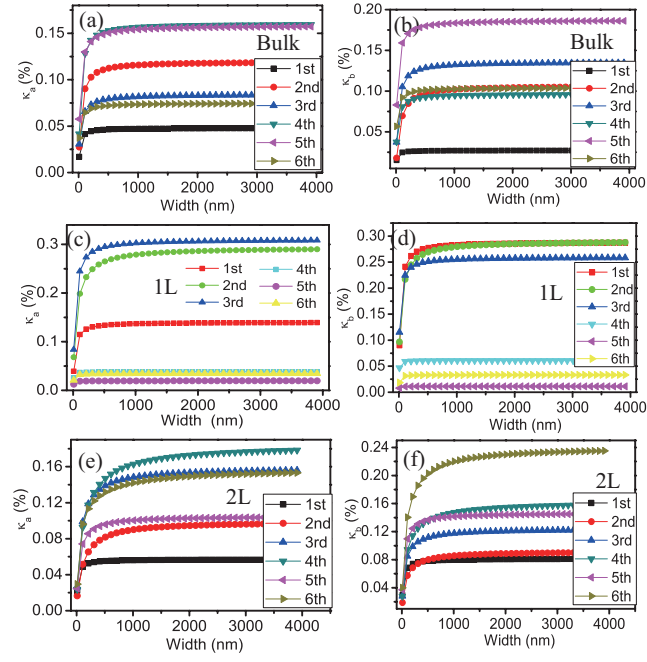

FIG. S6. Mode-resolved thermal contribution versus the width of nanowires along the *a* and *b* axes for bulk (a)-(b), 1L (c)-(d) and 2L (e)-(f) PdSe<sub>2</sub>. The contributions (in %) from six lowest modes are plotted.

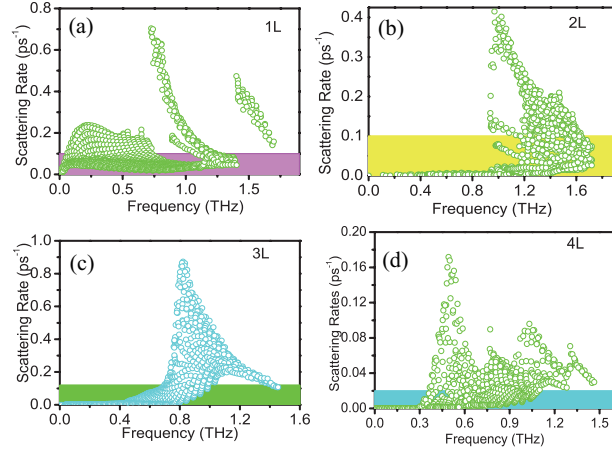

FIG. S7. Frequency-dependent scattering rates of ZA mode for 1L (a), 2L (b), 3L (c) and 4L (d) PdSe<sub>2</sub>. Dots in the shaded area are below the average value.

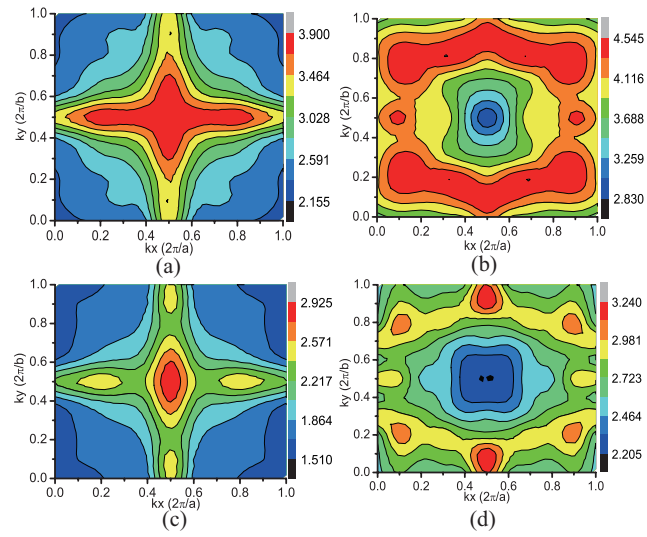

FIG. S8. Contours of the electron-phonon coupling strength for HVB (left column) and LCB (right column) of 3L (a)-(b) and 4L (c)-(d) PdSe<sub>2</sub>.

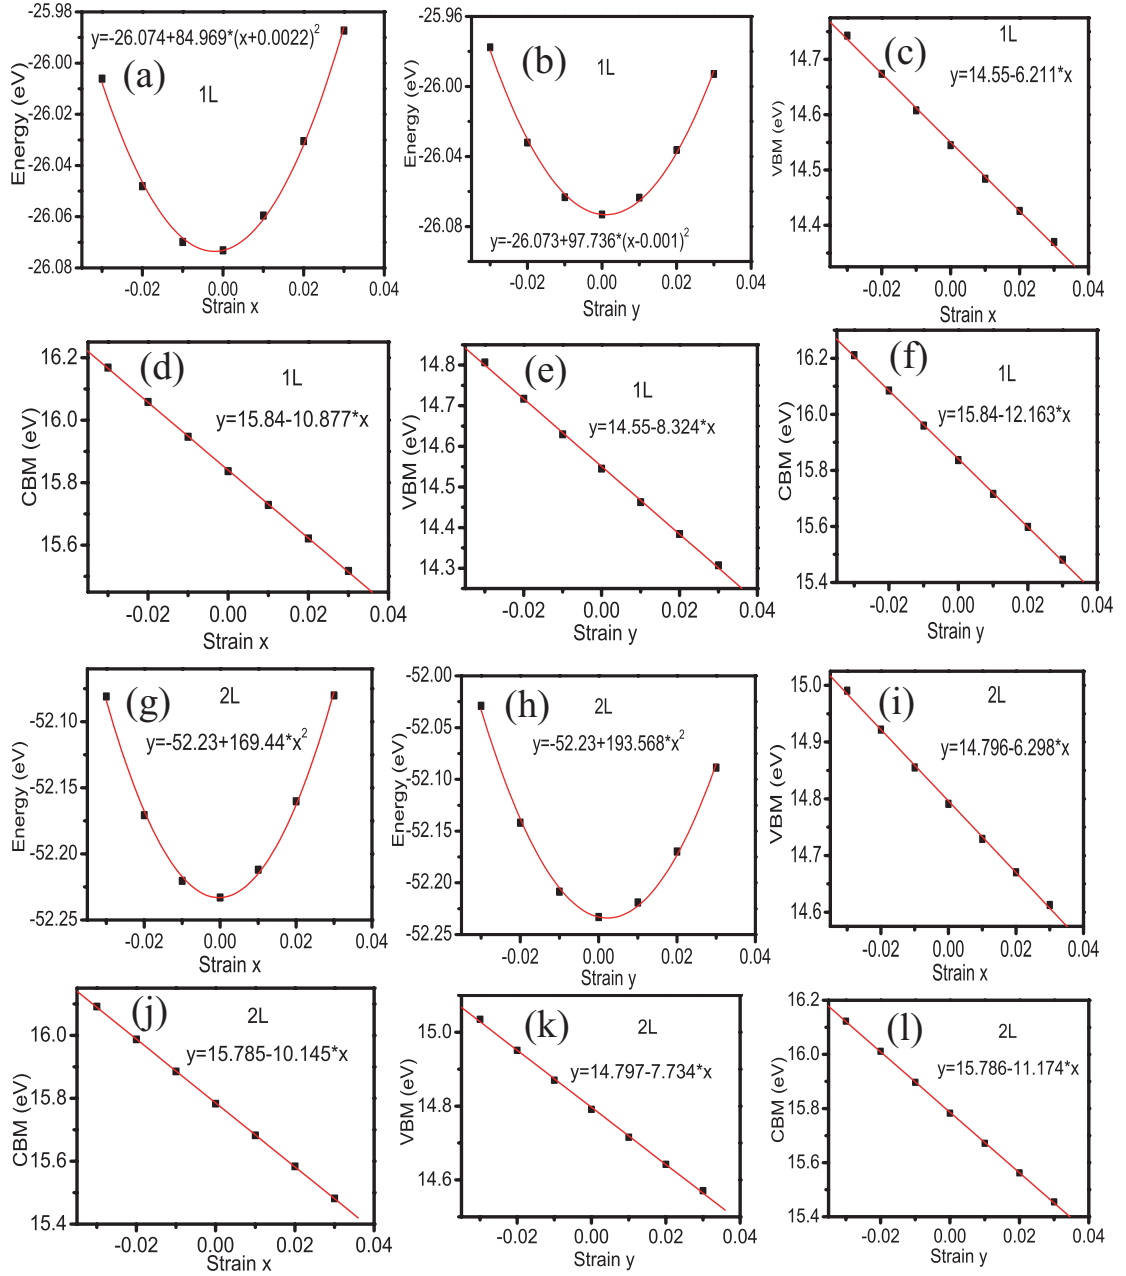

FIG. S9. (a)-(b) Energy variation with respect to the strain for 1L PdSe<sub>2</sub>. (c)-(f) Elastic constants obtained by fitting the strain -dependent band edge shift for 1L PdSe<sub>2</sub>. (g)-(h) Energy variation with respect to the strain for 2L PdSe<sub>2</sub>. (i)-(l) Elastic constants obtained by fitting for 2L PdSe<sub>2</sub>. The solid lines are the linear fittings.

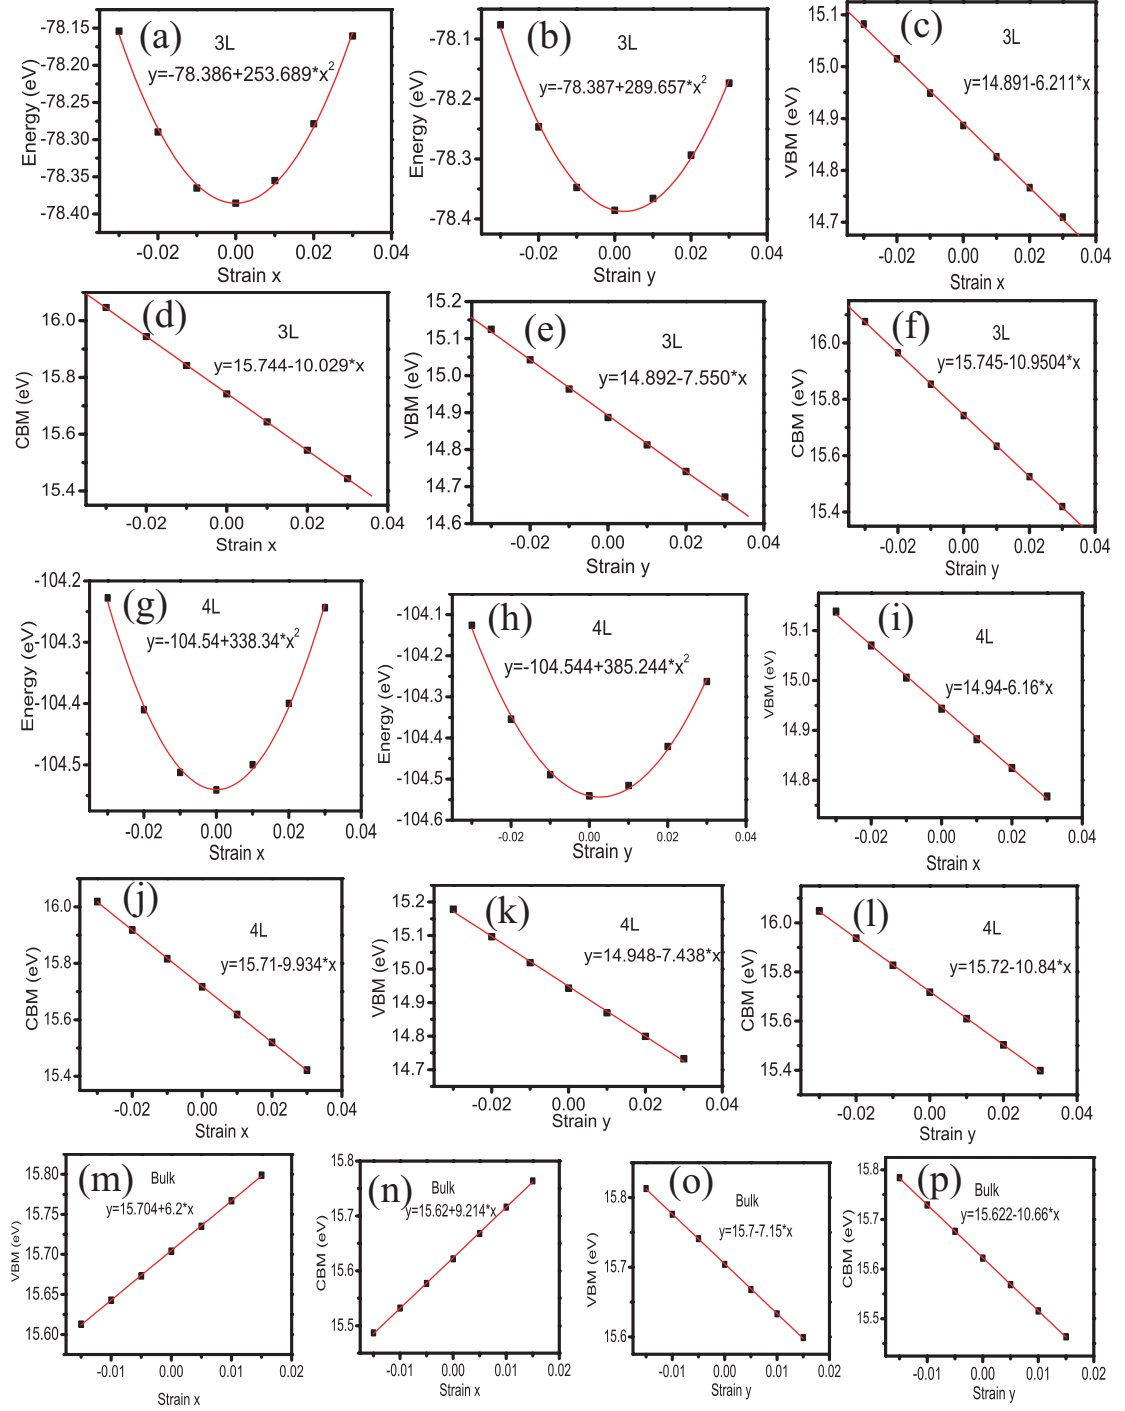

FIG. S10. (a)-(b) Energy variation with respect to the strain for 3L PdSe<sub>2</sub>. (c)-(f) Elastic constants obtained by fitting the strain -dependent band edge shift for 3L PdSe<sub>2</sub>. (g)-(h) Energy variation with respect to the strain for 4L PdSe<sub>2</sub>. (i)-(l) Elastic constants obtained by fitting for 4L PdSe<sub>2</sub>. (m)-(p) Band edge shift versus the strain. The solid lines are the linear fittings.
